# Supplementary material for: Crystal structure of dipeptidyl peptidase III from the human gut symbiont Bacteroides thetaiotaomicron
Source: PubMed Central journal article supplement (PMC5667867; doi:10.1371/journal.pone.0187295), 2017-11-02
Supplement: pone.0187295.s001.pdf [file pone.0187295.s001.pdf]

Supplementary Table 1. Primers used for cloning and mutagenesis.

|       | Forward                                          | Reverse                                        |
|-------|--------------------------------------------------|------------------------------------------------|
| WT    | 5'-GCACTAGCTAGCATGGCAGTTACCGCTACGATCC-3'         | 5'-CCGGCTCGAGATTATTACGGAAGGCAACGGAGAA-3'       |
| C11S  | 5'-GCTACGATCCTTGCACTCCTGGTGGGGCCAAAACAAC-3'      | 5'-GTTGTTTTGGCCCCACCAGAGGATGCAAGGATCGTAGC-3'   |
| C158S | 5'-CAGACTGCCGAACAACCTCTGATGAGCTCTTCCCGG-3'       | 5'-CCGGGAAGAGCTCATCAGAGAGTTGTTCCGGCAGTCTG-3'   |
| C189S | 5'-CTTGGTGCTGACTTCTGCCTCCAATTATTACGACGGAG-3'     | 5'-CTCCGTCGTAATAATTGGAGGCAGAAGTCAGCACCAAG-3'   |
| C425S | 5'-GGATTCAATGAAGAGTTTGTCTCCAATGACGAAGAGAGACAG-3' | 5'-CTGTCTCTTTCGTCATTGGAGACAAACTTTCATTGAATCC-3' |
| C450S | 5'-CAGACTTACATGAAAGCCTGGGACATGGTTCGG-3'          | 5'-CCGAACCATGTCCAGGCTTTCATGTAAGTCTG-3'         |
