# Supplementary material for: Crystal structure of dipeptidyl peptidase III from the human gut symbiont Bacteroides thetaiotaomicron
Source: PubMed Central journal article supplement (PMC5667867; doi:10.1371/journal.pone.0187295), 2017-11-02
Supplement: pone.0187295.s002.pdf [file pone.0187295.s002.pdf]

Supplementary Table 2. M49 family peptidases from different species used in phylogenetic analysis.

| Abbreviation | Species                           | Accession number | Species group                |
|--------------|-----------------------------------|------------------|------------------------------|
| MONDOM       | <i>Monodelphis domestica</i>      | F6ZXH8           | mammals                      |
| SARHAR       | <i>Sarcophilus harrisii</i>       | G3W555           |                              |
| MUSMUS       | <i>Mus musculus</i>               | Q99KK7           |                              |
| RATNOR       | <i>Rattus norvegicus</i>          | O55096           |                              |
| NEOLEP       | <i>Neotoma lepida</i>             | A0A1A6HW94       |                              |
| CRIGRI       | <i>Cricetulus griseus</i>         | G3I2H0           |                              |
| TUPCHI       | <i>Tupaia chinensis</i>           | L8Y5A0           |                              |
| HETGLA       | <i>Heterocephalus glaber</i>      | A0A0P6JC08       |                              |
| CAVPOR       | <i>Cavia porcellus</i>            | H0UUH1           |                              |
| ICTTRI       | <i>Ictidomys tridecemlineatus</i> | I3ME44           |                              |
| LOXAFR       | <i>Loxodonta africana</i>         | G3T8L7           |                              |
| MUSPUT       | <i>Mustela putorius</i>           | M3XVE8           |                              |
| PANTIG       | <i>Panthera tigris</i>            | A0A060KZU3       |                              |
| EQUCAB       | <i>Equus caballus</i>             | F6TNY4           |                              |
| HOMSAP       | <i>Homo sapiens</i>               | Q9NY33           |                              |
| CALJAC       | <i>Callithrix jacchus</i>         | U3FHY1           |                              |
| SUSSCR       | <i>Sus scrofa</i>                 | L8I2E6           |                              |
| BOSMUT       | <i>Bos mutus</i>                  | F1RU52           |                              |
| PANGUT       | <i>Pantherophis guttatus</i>      | A0A098LYJ3       | non mammalian<br>vertebrates |
| OPHAES       | <i>Opheodrys aestivus</i>         | A0A098LWX2       |                              |
| BOIIRR       | <i>Boiga irregularis</i>          | A0A0B8RRY3       |                              |
| CROADA       | <i>Crotalus adamanteus</i>        | J3RZ30           |                              |
| ESHCOL       | <i>Echis coloratus</i>            | A0A0A1WDL0       |                              |
| XENLAE       | <i>Xenopus laevis</i>             | 0                |                              |
| XENTRO       | <i>Xenopus tropicalis</i>         | Q6DE90           |                              |
| ASTMEX       | <i>Astyanax mexicanus</i>         | F7DZ42           |                              |
| DANRER       | <i>Danio rerio</i>                | W5KIP6           |                              |
| SCLFOR       | <i>Scleropages formosus</i>       | Q6DI20           |                              |
| ONCMYK       | <i>Oncorhynchus mykiss</i>        | A0A0N8JZV5       |                              |
| SALSAL       | <i>Salmo salar</i>                | A0A060X8W4       |                              |
| TAKRUB       | <i>Takifugu rubripes</i>          | B5X435           |                              |
| NOTFUR       | <i>Nothobranchius furzeri</i>     | H2TEX3           |                              |
| APHSTR       | <i>Aphyosemion striatum</i>       | A0A1A8ABL4       |                              |
| FUNHET       | <i>Fundulus heteroclitus</i>      | A0A1A7YL47       |                              |
| GASACU       | <i>Gasterosteus aculeatus</i>     | A0A146P4W4       |                              |
| ORENIL       | <i>Oreochromis niloticus</i>      | G3QAW5           |                              |
| CALMIL       | <i>Callorhinchus milii</i>        | I3JPG4<br>V9KGU9 |                              |
| BACDOR       | <i>Bactrocera dorsalis</i>        | A0A034VA64       | arthropods                   |
| DROMOJ       | <i>Drosophila mojavensis</i>      | B4K999           |                              |
| DROMEL       | <i>Drosophila melanogaster</i>    | Q9VHR8-2         |                              |
| GLOMOR       | <i>Glossina morsitans</i>         | D3TMQ7           |                              |
| STOCAL       | <i>Stomoxys calcitrans</i>        | A0A1I8NZT2       |                              |
| ANOFAR       | <i>Anopheles farauti</i>          | A0A182QC05       |                              |
| APIMEL       | <i>Apis mellifera</i>             | A0A088A023       |                              |

|                                                                                                                                                                                                                    |                                                                                                                                                                                                                                                                                                                                                                                                                                                                                                                                                                                                                                                                                                                                                                                                                                 |                                                                                                                                                                                                                |           |
|--------------------------------------------------------------------------------------------------------------------------------------------------------------------------------------------------------------------|---------------------------------------------------------------------------------------------------------------------------------------------------------------------------------------------------------------------------------------------------------------------------------------------------------------------------------------------------------------------------------------------------------------------------------------------------------------------------------------------------------------------------------------------------------------------------------------------------------------------------------------------------------------------------------------------------------------------------------------------------------------------------------------------------------------------------------|----------------------------------------------------------------------------------------------------------------------------------------------------------------------------------------------------------------|-----------|
| DAPPUL<br>DAPMAG<br>GRAATR                                                                                                                                                                                         | <i>Daphnia pulex</i><br><i>Daphnia magna</i><br><i>Graphocephala atropunctata</i>                                                                                                                                                                                                                                                                                                                                                                                                                                                                                                                                                                                                                                                                                                                                               | E9GTX0<br>A0A162P8G7<br>A0A1B6KD94                                                                                                                                                                             |           |
| NECAME<br>ANCCEY<br>ANGCOS<br>HAEPLA<br>CAEELE<br>DRAMED<br>SYPMUR<br>TOXCAN<br>PRIPAC<br>STEGLA<br>BURXYL                                                                                                         | <i>Necator americanus</i><br><i>Ancylostoma ceylanicum</i><br><i>Angiostrongylus costaricensis</i><br><i>Haemonchus placei</i><br><i>Caenorhabditis elegans</i><br><i>Dracunculus medinensis</i><br><i>Syphacia muris</i><br><i>Toxocara canis</i><br><i>Pristionchus pacificus</i><br><i>Steinernema glaseri</i><br><i>Bursaphelenchus xylophilus</i>                                                                                                                                                                                                                                                                                                                                                                                                                                                                          | W2SLT7<br>A0A0D6M7T1<br>A0A0R3PGV3<br>A0A0N4X8W6<br>G5ECW7<br>A0A0N4U2V0<br>A0A0N5AXJ5<br>A0A0B2VIP3<br>A0A0F5CUX7<br>A0A1I7YLE5<br>A0A1I7SCL0                                                                 | nematodes |
| SCHCOM<br>LEUSP<br>HETIRR<br>CANGLA<br>SACCCER<br>CYBJAD<br>OGAPAR<br>NEOFIS<br>EXOSPI<br>AURPUR                                                                                                                   | <i>Schizophyllum commune</i><br><i>Leucoagaricus sp</i><br><i>Heterobasidion irregulare</i><br><i>Candida glabrata</i><br><i>Saccharomyces cerevisiae</i><br><i>Cyberlindnera jadinii</i><br><i>Ogataea parapolyomorpha</i><br><i>Neosartorya fischeri</i><br><i>Exophiala spinifera</i><br><i>Aureobasidium pullulans</i>                                                                                                                                                                                                                                                                                                                                                                                                                                                                                                      | D8PVF6<br>A0A137QPX9<br>W4KKQ6<br>A0A0W0CQ92<br>Q08225<br>A0A0H5CH85<br>W1QG85<br>A1CY04<br>A0A0D1Y698<br>A0A074XX23                                                                                           | fungi     |
| FLABAC2<br>KORALG<br>DOKDON<br>CROATL<br>GRAFOR<br>FLABAC1<br><br>OPITER<br><br>PEDSAL<br>PLEPAC<br>BACCEL<br><br>BACTHE<br>PARMER<br>PARJOH<br><br>PREMAR<br>PRERUM<br><br>ALISHA<br>ALIPUT<br>PORGIN1<br>PORGIN2 | <i>Flavobacteriales bacterium</i><br><i>Kordia algicida</i><br><i>Dokdonia donghaensis</i><br><i>Croceibacter atlanticus</i><br><i>Gramella forsetii</i><br><i>Flavobacteria bacterium</i> (strain BBFL7)<br><i>Opitutus terrae</i> (strain DSM 11246/PB90-1)<br><i>Pedobacter saltans</i> DSM 12145<br><i>Plesiocystis pacifica</i> SIR-1<br><i>Bacteroides cellulosilyticus</i> DSM 14838<br><i>Bacteroides thetaiotaomicron</i><br><i>Parabacteroides merdae</i> ATCC 43184<br><i>Parabacteroides johnsonii</i> DSM 18315<br><i>Prevotella marshii</i> DSM 16973<br><i>Prevotella ruminicola</i> (strain ATCC 19189/JCM 8958/23)<br><i>Alistipes shahii</i> WAL 8301<br><i>Alistipes putredinis</i> DSM 17216<br><i>Porphyromonas gingivalis</i><br><i>Porphyromonas gingivalis</i> (strain ATCC 33277/ DSM 20709/JCM 12257) | A4AQA4<br>A9ECI1<br>A2TUF5<br>A3U8C5<br>A0LXF2<br>Q26C69<br><br>B1ZZ02<br><br>E4KIB0<br>A6GID1<br>E2NMV7<br><br>Q8A6N1<br>A7ACL0<br>B7BE50<br><br>E0NQE0<br>D5ERS0<br><br>D4IQ41<br>B0MWP5<br>Q7MX92<br>B2RLB9 | bacteria  |
